1 **TITLE**

2 Perceptions of and obstacles to SARS-CoV-2 vaccination among adults in Lebanon: a cross-  
3 sectional online survey

4

5 **ABSTRACT**

6 The COVID-19 pandemic is an additional burden on Lebanon’s stressed population, fragmented  
7 healthcare system, and political, economic, and refugee crises. Understanding the population’s  
8 intentions to vaccinate, and perceptions of and obstacles to SARS-CoV-2 vaccination, can  
9 inform Lebanon’s vaccination efforts. We performed a cross-sectional study from 29 Jan 2021 to  
10 11 Mar 2021 using an online questionnaire in Arabic via convenience “snowball” sampling to  
11 assess the perceptions of adults residing in Lebanon. 1,185 adults participated in the survey.  
12 46.1% [95% CI: 43.2%-49.0%] of survey participants intended to take the SARS-CoV-2 vaccine  
13 when available to them, 19.0% [16.8%-21.4%] indicated that they would not, and 34.0% [31.3%-  
14 36.8%] were unsure. The most common reasons for hesitancy were concerns about safety,  
15 limited testing, side effects, and efficacy. Vaccine hesitancy appears to be high in Lebanon.  
16 Disseminating clear, consistent, evidence-based safety and efficacy information on vaccines may  
17 help reduce vaccine hesitancy, especially among the large proportion of adults who appear to be  
18 unsure about (rather than opposed to) vaccination.

19

20 **AUTHORS**

21 Nadeem E. Abou-Arraj, MD, MPH<sup>1,2,y</sup>; Diana Maddah, MPH<sup>3,y</sup>; Vanessa Buhamdan, BS<sup>3</sup>; Roua  
22 Abbas, BS<sup>3</sup>; Nadine Jawad, MPhil<sup>4</sup>; Fatima Karaki, MD<sup>5,z</sup>; Nael H. Alami, MA, MSc, PhD<sup>6,z</sup>;  
23 Pascal Geldsetzer, MD, MPH, PhD<sup>7,8,z</sup>

24 1. School of Public Health, University of California, Berkeley, CA, USA. [narraj@berkeley.edu](mailto:narraj@berkeley.edu)

- 25           2. Department of Medicine, Stanford University School of Medicine, Stanford, CA, USA  
26           3. School of Health Sciences, Modern University for Business and Science, Lebanon  
27           4. Stanford University School of Medicine, Stanford, CA, USA  
28           5. Refugee and Asylum seeker Health Initiative (RAHI), Department of Medicine, University of California San Francisco, CA, USA  
29           6. Modern University for Business and Science, Lebanon  
30           7. Division of Primary Care and Population Health, Department of Medicine, Stanford University, Stanford, CA, USA  
31           8. Heidelberg Institute of Global Health, Heidelberg University, Germany  
32           Y. NEA and DM are co-first authors of this paper.  
33           Z. PG, NHA, and FK are co-senior authors of this paper.

34

## 35   **KEYWORDS**

36   Lebanon, COVID-19, SARS-CoV-2, coronavirus, vaccination, vaccine hesitancy

37

38

## 39   **INTRODUCTION**

40           As of 18 May 2021, Lebanon’s cumulative positive COVID-19 case count was 536,554  
41   people (78,611 cases per million), and at least 7,641 people have died [1]. Already a devastating  
42   toll, this number is likely significantly underreported due to lack of testing and fragmented health  
43   infrastructure in the country [2]. In addition to the pandemic, Lebanon has been struggling with  
44   multiple challenges: a political crisis and economic collapse driven by corruption that began in  
45   2019 and worsened throughout 2020, leading to widespread mistrust of the government,  
46   inflation, unemployment, poverty, and increased food insecurity, on top of the strain of being the  
47   country with the highest number of refugees per capita in the world due to the protracted Syrian  
48   refugee crisis [2–6]. Given Lebanon’s compounding crises and limited resources, mass  
49   vaccination is a challenging but vital mission. Understanding the population’s perceptions of  
50   SARS-CoV-2 vaccines is critical for implementing a successful vaccination campaign in the

51 country, providing extra support for vulnerable populations, and bolstering demand for  
52 vaccination.

53 SARS-CoV-2 vaccination began in Lebanon on 14 February 2021 [7]. Despite  
54 comprehensive planning and outreach efforts from the Lebanese Ministry of Public Health and  
55 prominent non-governmental organizations including the World Health Organization and  
56 UNICEF, and international assistance from the World Bank and COVAX to secure adequate  
57 supply of SARS-CoV-2 vaccines of multiple formulations, as of 18 May 2021, only 208,086  
58 people had been fully vaccinated, representing approximately 3.1% of the total population [1,8–  
59 10]. Inadequate demand, possibly due to vaccine hesitancy and/or logistical challenges, appears  
60 to be at least part of the reason for slow vaccination; at the largest public hospital in Beirut, up to  
61 30% of vaccination appointments went unfilled during days in April 2021 [4]. As of 19 May  
62 2021, only roughly 20% of the population has registered for the vaccine using the online national  
63 vaccine registration tool through the Ministry of Public Health [7]. Given the significant  
64 proportion of the population still needing vaccination, understanding perceptions of the vaccines  
65 and perceived obstacles is important to increasing vaccination rates to end the pandemic.

66 Previous studies of vaccination in Lebanon provide some background for anticipating the  
67 response to SARS-CoV-2 vaccination. An online survey of Lebanese in April-May 2020 found  
68 that 69% of the convenience sample (predominantly young, university-educated, and male)  
69 indicated they would take a hypothetical vaccine against SARS-CoV-2, though at that time, none  
70 had been developed or approved [11]. One study of seasonal influenza vaccination in Lebanon  
71 demonstrated that 28% of ambulatory adult patients at pharmacies were vaccinated (rates  
72 comparable to influenza vaccination across Europe) and factors associated with vaccination  
73 included belief in vaccine necessity, efficacy, and safety, as well as having private insurance,

74 elderly age, higher educational attainment, and higher physical activity [12,13]. In a study of  
75 Lebanese physicians' perspective on the pneumococcal and influenza vaccines, physicians cited  
76 availability and cost concerns, patients' declining to be vaccinated, and physicians' doubts over  
77 efficacy as barriers to vaccination [14]. For the refugee population specifically, several studies  
78 have assessed vaccination in displaced Syrians living in Lebanon, finding inadequate rates of  
79 childhood vaccination, high variability by location within Lebanon, and challenges in  
80 maintaining vaccination records [15–17].

81         Studies of SARS-CoV-2 vaccination intentions and perceptions in other countries and  
82 regions can also be helpful in informing the vaccination campaign in Lebanon. Surveys assessing  
83 SARS-CoV-2 vaccine hesitancy around the world cite reasons for hesitancy including safety  
84 concerns, worries about side effects, doubts about efficacy, unfavorable personal risk/benefits  
85 assessments of the SARS-CoV-2 vaccine, as well as general mistrust in science and government  
86 [18–20]. Other barriers include distribution and uptake of the vaccines at scale, which are matters  
87 of logistics, healthcare access, and public perception of the vaccine [21,22]. These issues may be  
88 exacerbated in the Lebanese context given the deeply seated mistrust of government as well as  
89 compounding social crises, but to our knowledge, no such study has been done to elucidate  
90 perceptions of the SARS-CoV-2 vaccination campaign in Lebanon.

91         It is therefore important to establish an evidence-based understanding of the perceptions  
92 of the SARS-CoV-2 vaccines among the Lebanese population. Our study's aims were 1) to  
93 assess rates of intention to vaccinate and vaccine hesitancy in Lebanon; 2) to determine how  
94 vaccine hesitancy in Lebanon varies by sociodemographic, economic, and geographic  
95 characteristics; and 3) to understand individuals' motivations for vaccinating and concerns and  
96 obstacles to vaccination.

97

## 98 **METHODS**

### 99 Study Design

100 To assess perceptions of SARS-CoV-2 vaccination in Lebanon, we designed a cross-  
101 sectional descriptive study employing a remote online Arabic survey. We originally intended to  
102 distribute it to randomly selected Lebanese phone numbers to obtain an unbiased nationally  
103 representative sample, but during piloting, this method needed to be aborted because of  
104 exceedingly low response rates (less than 1%), thought to be due to mistrust of messages and  
105 links received from an unknown phone number. Given these constraints, we changed our  
106 distribution methods to convenience “snowball” sampling, a method further described below that  
107 had successfully been used elsewhere in the Middle East to quickly recruit a large sample size  
108 [23].

109 After making these adjustments, an anonymous, online, self-administered survey was  
110 created and distributed using convenience “snowball” sampling. The recruitment and survey  
111 period was six weeks: 29 January 2021 - 11 March 2021. This time period spanned before and  
112 after initiation of SARS-CoV-2 vaccination in Lebanon, which began on 14 February 2021 [7].

113

### 114 Study Population

115 The target population was all adults living in Lebanon, including the significant refugee  
116 population. While all adults living in Lebanon were eligible to participate, they needed to be able  
117 to access the self-administered online survey tool, either on a mobile phone or computer. The  
118 survey was in Arabic, so participants were required to be literate in Arabic or to be assisted by  
119 someone who was.

120

121 Recruitment and Sampling:

122           We created an anonymous online Qualtrics survey (see appendix) distributed and  
123 administered in Arabic [24]. To disseminate the survey, we created a recruitment message in  
124 Arabic (see appendix) that introduced the survey and asked if the message recipients would be  
125 interested in participating. Given the convenience “snowball” sampling method, the research  
126 team initiated recruitment by sending the survey to their contacts and throughout their  
127 organizations. Participants who were interested in the study proceeded to the survey via a link at  
128 the end of the recruitment message. The recruitment message also invited participants to forward  
129 the message to their contacts. The message could be sent through WhatsApp, SMS, social media,  
130 and email. There was no follow up to determine whether individuals who received the  
131 recruitment message completed or forwarded the survey. No incentives were provided to  
132 participants for participation in the study.

133

134 Survey Tool and Data Collection

135           The survey was created using the Qualtrics online survey platform [24]. It was  
136 anonymous, self-administered, and did not require more than basic literacy in Arabic.

137           The survey content was created by the research team (the majority of whom were fluent  
138 in Arabic and English), using several other SARS-CoV-2 vaccine perception studies as a guide  
139 [25,26], and tailored to the Lebanese context. It was piloted in small groups of contacts of the  
140 research team who had varying educational backgrounds and health literacy and revised several  
141 times prior to official survey launch.

142 The survey consisted of 31 multiple-choice and free-response questions (depending on  
143 branch points, participants were not asked each question), divided into an introduction with the  
144 informed consent document, followed by questions about screening, demographics, questions  
145 experience with COVID-19, and perceptions of SARS-CoV-2 vaccination. No identifying data  
146 was collected. The first questions asked participants to provide informed consent, to affirm that  
147 they were 18 years or older and living in Lebanon, and to verify that they had heard of  
148 “coronavirus” (as SARS-CoV-2 and COVID-19 are referred to in Lebanese Arabic). If they  
149 declined, the survey automatically ended. If they passed these questions, they were able to  
150 proceed with the survey.

151 The survey consisted of three sections. The “coronavirus vaccine” section assessed  
152 intentions to receive or not to receive vaccination and motivations behind these decisions. It also  
153 asked about participants’ preferred location to receive the coronavirus vaccine, how much money  
154 they would be willing to pay for the vaccine if it were to cost money, and if monetary incentives  
155 could influence their decision on taking the vaccine.

156 The “experience with coronavirus” section surveyed participants’ most frequently used  
157 news sources about coronavirus, their most trusted news sources, how often they wore a face  
158 mask as a preventative measure when leaving their homes, and whether they or anyone they  
159 knew had been infected with coronavirus.

160 The “demographics” section included questions on gender, age, religion, household  
161 income for the year 2019, education level, geographic location, nationality, and refugee status.  
162 Once participants started the survey, they had 48 hours to complete it before the survey  
163 automatically recorded their responses. Participants were prevented from taking the survey  
164 multiple times on the same device using a Qualtrics feature based on browser cookies.

165

## 166 Data Analysis

167 Data were downloaded from Qualtrics as a .csv file and translated into English using  
168 Microsoft Excel [27]. Data cleaning and statistical analysis were performed in R computer  
169 software and focused on description rather than identifying causal links [28].

170 Several quality measures were implemented. To ensure that participants had at least a  
171 baseline familiarity with the survey topics, one of the screening questions asked whether  
172 participants had heard of “coronavirus.” If they had not, they were not able to proceed with the  
173 survey; only 5 participants (0.42%) were excluded because of not being aware of “coronavirus.”  
174 To identify participants who randomly clicked through the survey, a filter was applied to detect  
175 participants who completed the survey in less than 120 seconds; no participants did so.

## 176 *Quantitative Data Analysis*

177 For some multiple-choice questions, similar categorical responses were consolidated into  
178 binary or fewer categories to facilitate interpretation. For binary and categorical variables, the  
179 absolute number and relative proportions of participants who selected each response was  
180 calculated. Wilson score 95% confidence intervals were calculated for proportions.

181 Given that the survey period spanned the initiation of SARS-CoV-2 vaccination in  
182 Lebanon, a sub-analysis was performed in which participants were divided by whether they  
183 completed the survey before or after vaccine initiation. For each of these sub-groups, sample  
184 demographics were recalculated and are displayed in Table 1. We did not use sampling weights  
185 in our analysis given that this was a non-probabilistic sample of the Lebanese population that  
186 was unlikely to be representative of the general population even after weighting.

## 187 *Qualitative Data Analysis*



188           If participants indicated that they intend to vaccinate, they were then asked, “Why do you  
189 plan to get the coronavirus vaccine if and when it becomes available to you?” If they intended  
190 not to vaccinate, they were asked, “Why do you plan on not getting the coronavirus vaccine if  
191 and when it becomes available to you?” If they were uncertain about vaccinating, they were  
192 asked, “Why are you unsure about getting the coronavirus vaccine if and when it becomes  
193 available?”

194           These open-ended responses were coded using a uniform protocol in order to facilitate  
195 analysis (see appendix). First, each response was translated from Arabic into English by one of  
196 six bilingual members of the research team. This translation was then verified by a second  
197 bilingual member of the research team. The English translations were then coded using thematic  
198 analysis by one of eight members of the research team. A second coder reviewed the first team  
199 member’s codes to verify accuracy and authenticity. Disagreements were discussed and  
200 consensus was achieved usually between the two coders. Rarely, a third member of the coding  
201 team (NEA or VB) was needed to resolve a disagreement. The list of codes was constructed and  
202 updated iteratively throughout the coding process. Multiple codes could apply to the same  
203 response. To ensure consistency in coding between coders and responses, one team member  
204 (NEA) reviewed all codes. Codes were then ordered from most common to least common.

205

## 206 **RESULTS**

### 207 Sample Characteristics

208           1,390 participants initiated the survey. Of these, 1,185 (85.3%) provided informed  
209 consent and passed screening to begin the main survey (Figure 1). Among this group, 1,103

210 (93.1%) participants completed the entire survey. Sample demographic characteristics of those  
211 who passed screening are summarized in Table 1.

212 Compared to demographics of residents of Lebanon in general, our sample population  
213 had higher representation of individuals who were young, female, well-educated, identified with  
214 the Druze religion, and from the Mt. Lebanon region (Table 1). Underrepresented in our sample  
215 were the elderly, refugees, non-Lebanese citizens, members of the Sunni and Shi'a religions, and  
216 individuals from the less populated governorates of Akkar, Baalbek-Hermel, Nabatieh, North,  
217 and South.

218

## 219 Quantitative Analysis

### 220 *Intentions to Vaccinate*

221 We found that 46.1% [95% CI: 43.2%-49.0%] of our survey participants intended to take  
222 the SARS-CoV-2 vaccine when available to them. 19.0% [16.8%-21.4%] indicated that they  
223 would not get vaccinated, and 34.0% [31.3%-36.8%] were unsure about vaccination (Table 2).

224

### 225 *Intentions to Vaccinate by Demographic Characteristics*

226 Overall, participants were more likely to intend to vaccinate if they identified as male;  
227 lived in the Beqaa governorate (Mount Lebanon as reference); were a member of Christian,  
228 Sunni, or no religion (Druze as reference); and had higher household income (Table 2 & Figure  
229 2).

230 There were less strong but still apparent trends toward higher proportions of participants'  
231 intending to vaccinate if they identified as older in age; lived in Beirut or Akkar governorates  
232 (Mount Lebanon as reference); had attained higher educational status; or were employed. There

233 were no apparent differences or trends in intention to vaccinate by country of citizenship or  
234 whether participants identified as refugees.

235

### 236 *Intentions to Vaccinate by Experiences with COVID-19*

237 Comparing participants who reported a personal history of COVID-19 infection (n = 321  
238 [28.9%]) to those who did not (n = 790 [71.1%]), there did not appear to be large differences in  
239 vaccine acceptance (48.8% [45.2%-52.3%] vs. 42.9% [37.5%-48.6%]) (Table 3). However, those  
240 with a family member or close friend who had contracted COVID-19 (n = 1056 [94.2%]) were  
241 substantially more likely to intend to vaccinate, compared to individuals who did not (48.0%  
242 [44.9%-51.0%] vs. 33.3% [22.2%-46.4%]). Notably, the proportion of participants who did not  
243 have a close acquaintance who had been infected was low (n = 65 [5.8%]).

244 When compared to participants who reported “sometimes,” “rarely,” or “never” wearing  
245 a mask when outside the home (n = 97 [8.8%]), participants who reported wearing a mask  
246 “always” or “most of the time” (n = 1011 [91.2%]) were much more likely to intend to vaccinate  
247 (50.0% [46.8%-53.1%] vs 18.6% [11.7%-28.0%]).

248 We also asked participants to identify their top three most commonly used sources of  
249 news for coronavirus. Participants who reported commonly obtaining news from newspapers and  
250 magazines or the radio were more likely to intend to vaccinate than those who reported  
251 television, social media, other internet websites, and family and friends as common sources of  
252 news. Very few participants (n = 6 [0.5%]) reported that religious leaders are a commonly used  
253 source of news.

254

### 255 *Intentions to Vaccinate before and after Initiation of Vaccination in Lebanon*

256 Those who completed the survey after initiation of vaccination were more likely to intend  
257 to vaccinate (56.9% [51.5%-62.2%]) when compared to those who completed the survey before  
258 initiation of vaccination (42.3% [38.9%-45.7%]) (Table 2). Importantly, these groups were  
259 contacted differently and differed in several key demographic characteristics: the group of  
260 participants who responded after initiation of vaccination was younger and had a higher  
261 proportion of participants that lived outside of the Mount Lebanon region, identified as Shi'a or  
262 Sunni rather than Druze or Christian, had European or North American or multiple citizenships,  
263 and identified as refugees (Table 1).

264

#### 265 *Logistical Considerations about Vaccination*

266 The most commonly selected preferred locations to get vaccinated were hospitals,  
267 doctors' offices, primary health centers, and pharmacies (Figure 3). Temporary vaccination sites  
268 were not popular. The most common sources of news about coronavirus were television, social  
269 media, and other internet websites (Figure 4). Participants trusted television and internet websites  
270 more than social media. Among participants who did not intend to vaccinate or were uncertain  
271 about vaccination, less than 2% stated that a monetary incentive would persuade them to become  
272 vaccinated.

273

#### 274 Qualitative Analysis

##### 275 *Top motivations for intending to vaccinate*

276 Most frequently, participants cited the following motivations for their decisions to  
277 vaccinate: to protect themselves, their families, and the public, and to end the pandemic and  
278 return to normal life (Table 4). Somewhat frequently given reasons for intending to vaccinate

279 included that participants felt like they “had no other choice” given the state of the pandemic,  
280 and that participants trusted science and research.

281

### 282 *Top reasons for vaccine hesitancy*

283         Among participants who responded that they did not intend to be vaccinated, several  
284 themes emerged (Table 4). The most frequent reasons for vaccine hesitancy were concerns about  
285 safety given the fast development and limited testing of the vaccines, fears about side effects,  
286 and doubts about efficacy. Somewhat frequently cited concerns leading to vaccine hesitancy  
287 were mistrust in the Lebanese government.

288

### 289 *Top reasons for uncertainty about vaccination*

290         The most commonly provided reasons for uncertainty about whether participants planned  
291 to take the vaccine were similar: concerns about safety given the fast development and limited  
292 testing of the vaccines, fears about side effects, and doubts about efficacy (Table 4). Somewhat  
293 frequently mentioned concerns included mistrust of the Lebanese government and healthcare  
294 system, potential fraud in storage or marketing of the vaccines, wanting more information about  
295 the vaccines, and needing more time to decide which vaccine to take.

296

## 297 **DISCUSSION**

298         One of our study’s primary objectives was to determine the proportion of Lebanese adult  
299 residents who intended to take (*vaccine acceptance*), who did not intend to take (*vaccine*  
300 *hesitancy*), and who were unsure about taking the SARS-CoV-2 vaccine (*vaccine uncertainty*)  
301 when available to them (while deciding to use these terms, we acknowledge that they imperfectly

302 capture the complexity of individuals' decisions about vaccines) [29]. Our findings of rates of  
303 vaccine acceptance and vaccine hesitancy were similar to studies of other countries in the Middle  
304 East and across the world. Vaccine acceptance of 46.1% in our sample was similar to rates in  
305 Kuwait (53.1%) and Qatar (45%-60%); higher than rates in Jordan (28.4%); and somewhat lower  
306 than in Saudi Arabia (64.7%) [23,30–32]. Rates of vaccine acceptance in our study were also  
307 similar to a large survey of 15 developed countries across the globe, in which 54% of  
308 respondents indicated they intend to vaccinate [33]. Other studies found higher rates of vaccine  
309 acceptance in specific developed countries—US (67%), Japan (62.1%), Ireland (65%), and the  
310 UK (69%) [34–36]. However, these studies were conducted earlier than our study, prior to  
311 initiation of mass-scale vaccination, and as systematic reviews of vaccine perception studies  
312 showed, vaccine acceptance and hesitancy have varied with time throughout the pandemic, with  
313 a trend toward decreasing acceptance throughout 2020 [20,37]. Indeed, our results show lower  
314 rates of vaccine acceptance than a survey in April-May 2020 that included a question about  
315 acceptance of hypothetical SARS-CoV-2 vaccines, in which 69.3% of Lebanese residents stated  
316 they would be willing to take a vaccine; it is important to note that at this time, no vaccines were  
317 developed or approved, and this survey's population was 73.7% male and 89.0% aged younger  
318 than 45 years old, compared to our population which was 62.1% female and 79.1% aged younger  
319 than 45 years old [11].

320         One of our important secondary objectives was to assess which demographic  
321 characteristics were associated with vaccine hesitancy. Our findings of trends toward increased  
322 vaccine hesitancy in women, younger age groups, unemployed individuals, and individuals with  
323 lower education attainment are generally consistent with findings in the Middle East and  
324 globally, with the notable exception that in Kuwait and Qatar, hesitancy was increased in older

325 populations [30,31,35–37]. While our study attempted to assess the association of vaccine  
326 hesitancy with religion and income, two important demographic variables given Lebanon’s  
327 social, political, and economic context, 15.9% and 36.3% of participants skipped the questions  
328 about religion and income, respectively, demonstrating the topics’ sensitive natures. Therefore,  
329 we do not recommend making inferences from our study about differences in vaccine acceptance  
330 or hesitancy by religion or income. Similarly, refugees (n = 56, 5.1%) were underrepresented in  
331 our sample. While no significant difference in vaccine acceptance by refugee status emerged,  
332 further focus on vaccination in refugees in Lebanon is merited given their multiple  
333 vulnerabilities.

334 Another important secondary objective of our study was to evaluate how individuals’  
335 experiences with COVID-19 affected vaccine acceptance. Unsurprisingly, frequent mask  
336 wearing was associated with increased vaccine acceptance, likely because these individuals see  
337 COVID-19 as a more serious threat than those who do not wear masks frequently. The non-  
338 significant trend toward increased vaccine acceptance among participants with a close  
339 acquaintance who contracted COVID-19 could imply that personal experience with someone  
340 affected by the virus increases willingness to vaccinate. Interestingly, however, neither personal  
341 history of infection nor history of infection in a close contact was consistently associated with  
342 vaccine acceptance in a meta-analysis of SARS-CoV-2 perception studies [37].

343 The timing of our survey period spanned the initiation of vaccination in Lebanon. While  
344 our data suggested increased vaccine acceptance among participants who completed the survey  
345 after initiation of vaccination, this must be interpreted cautiously. The demographics of the  
346 respondents after initiation of vaccination were significantly different from those who completed  
347 the survey before initiation of vaccination. We believe that the differences in vaccine acceptance

348 before and after initiation of vaccination more likely reflect differences in populations surveyed  
349 during these periods, given the selection bias inherent in the convenience “snowball” sampling  
350 method.

351 Our study was conceived with the goal of providing information that would be useful for  
352 implementation of vaccination efforts in Lebanon. The logistical considerations about which we  
353 asked can provide some guidance. The most commonly selected sources of news about COVID-  
354 19 were television, social media, and internet websites; among these, television and internet  
355 websites were the most trusted. Though religion is influential in Lebanon, only 6 (0.5%)  
356 participants cited religious leaders as an important source of COVID-19 news. Given that  
357 respondents who selected newspapers, magazines, and radio were more likely to intend to  
358 vaccinate, focusing dissemination of vaccine promotion efforts on television, social media, and  
359 internet websites would appear to be most efficient to reach those who are hesitant to vaccinate.

360 Survey respondents also reported preferring to receive the vaccine at familiar, established  
361 health care sites: hospitals, doctors’ offices, primary health centers, and pharmacies. While  
362 temporary dedicated vaccination centers were not popular, a small but significant number of  
363 participants (106, 11.8%) stated they would prefer vaccination by a visiting medical professional  
364 to their homes. This could be an important means of reaching vulnerable patients willing to be  
365 vaccinated but unable to go to vaccination sites. A final logistical consideration about which our  
366 survey asked was whether a financial incentive would change participants’ minds so that they  
367 decide to vaccinate; overwhelmingly, they indicated that it would not (98.3%). Based on this  
368 study, it appears that offering a financial incentive would not be an efficient means of increasing  
369 vaccination rates in Lebanon.



370 Perhaps the most actionable information generated in this study involves motivations for  
371 vaccine acceptance and vaccine hesitancy. The most frequently provided reasons for intending to  
372 vaccinate were to protect oneself, to protect one's family and the public, and to end the  
373 pandemic. These goals are similar to the most common motivations in the Middle East and  
374 globally [30,31,37]. In our study, the most commonly provided reasons for SARS-CoV-2  
375 vaccine hesitancy involved concerns about its safety given the fast development and limited  
376 testing of the vaccines (including regarding the mRNA technology), fears about side effects, and  
377 doubts about efficacy. Somewhat frequently cited concerns leading to vaccine hesitancy were  
378 mistrust in the Lebanese government. Other reasons mentioned for vaccine uncertainty included  
379 worrying about potential fraud in storage or marketing of the vaccines, wanting more  
380 information about the vaccines, and needing more time to decide which vaccine to take. These  
381 results are consistent with those of studies globally [37,38]. While several participants in our  
382 study cited conspiracy theories as reasons for not vaccinating, these were relatively uncommon,  
383 especially compared to a study in other Arabic speaking countries, which found rates of belief in  
384 conspiracy theories of over 50% [32].

385 Interestingly, logistical factors were not frequently of concern among adults living in  
386 Lebanon. Despite financial hardships in Lebanon, barriers to vaccine access (cost, transportation,  
387 proximity to medical care) were not cited frequently as concerns about vaccination in our study.  
388 This might be explained by the fact that it has become common for governments, including in  
389 developing countries, to distribute the vaccine free of charge as a part of public health mandates.  
390 While a few participants did express preference for "the vaccine from China or Russia," most  
391 perceptions applied generally to all SARS-CoV-2 vaccines, and there were relatively few  
392 concerns about vaccine properties like number of required doses, country of origin, or specific

393 vaccine brands. Also uncommon in our study was generalized opposition to vaccination, i.e., not  
394 specific to SARS-CoV-2 vaccines. This is consistent with previous studies in Lebanon showing  
395 moderate uptake of routine vaccinations [12,14,15,17,39].

396         The relatively large proportion of participants in our study who were uncertain about  
397 vaccination—34.0%—provides a public health opportunity and imperative in the effort to  
398 achieve mass vaccination in Lebanon. The majority of concerns about SARS-CoV-2 vaccination  
399 involved absence of reliable information and data of safety and efficacy for this new medical  
400 technology. Increasing public availability in Lebanon of high-quality, data-driven, up to date,  
401 accessible information about the SARS-CoV-2 vaccines could assuage some of these concerns  
402 and increase vaccine acceptance. Based on our results about common COVID-19 news sources,  
403 we recommend disseminating clear, consistent, verifiable safety and efficacy information on  
404 television, social media, and news websites. Given the prevalence of mistrust in the government,  
405 third parties (like healthcare organizations) might be most likely to be trusted, especially if they  
406 promote vaccination using the motivators that those in our sample cited as reasons for  
407 vaccination.

408         Our study has several strengths. It is, to our knowledge, the first such academic study  
409 about SARS-CoV-2 vaccine intentions and perceptions in Lebanon. Its online platform allowed  
410 for rapid surveying of a large sample size remotely. The open-ended nature of the questions  
411 about reasons why participants intended or did not intend to vaccinate, or were uncertain about  
412 vaccination, allowed for participants to share their most central motivations without suggestive  
413 multiple-choice options, producing what we believe is a more authentic understanding of  
414 motivations and concerns.

415           There are several important limitations of our study. First and foremost, our sample is  
416 unlikely to be representative of the general population because of the sampling strategy. While  
417 we attempted to mitigate this by collecting and describing important demographic and  
418 experiential characteristics, the bias remains, and several important demographic groups were  
419 underrepresented, most notably the elderly, members of Shi'a and Sunni religions, residents  
420 outside of Beirut and Mount Lebanon, non-Lebanese citizens, and those who identify as  
421 refugees. Small sample sizes of subgroups limited analysis of associations with certain variables,  
422 especially governorate and citizenship. Second, participation required literacy in Arabic, access  
423 to the internet, and digital literacy, potentially excluding some populations (though it is  
424 noteworthy that >80% of refugees in Lebanon have access to mobile technology like WhatsApp)  
425 [40]. Third, some participants did not answer all questions, possibly leading to non-response  
426 bias. Finally, vaccine hesitancy, perceptions, and concerns may be changing rapidly over time;  
427 our results should be interpreted as pertaining to the time period during which the survey was  
428 conducted.

429

## 430 **CONCLUSION**

431           This cross-sectional study assessed intentions to vaccinate against SARS-CoV-2 among  
432 adults residing in Lebanon, analyzed characteristics that were associated with vaccine acceptance  
433 and hesitancy, and described motivations for and concerns about vaccination. We recommend  
434 disseminating clear, consistent, evidence-based safety and efficacy information on vaccines on  
435 the most commonly reported news sources by participants: television, social media, and news  
436 websites. As vaccination efforts continue, repeated assessments of intentions to vaccinate,  
437 concerns or obstacles regarding vaccination, and changes in motivations should be performed,

438 especially with the goal of assessing the perspectives and needs of populations that were  
439 underrepresented in this study.

440

#### 441 **ETHICAL APPROVAL AND INFORMED CONSENT**

442 This study was approved by the Institutional Review Boards of the University of  
443 California, Berkeley; the Modern University for Business and Science, Lebanon; and Stanford  
444 University (by reliance agreement with the University of California, Berkeley). Informed consent  
445 was obtained from all participants prior to the survey; a waiver of written informed consent was  
446 granted.

447

#### 448 **FUNDING**

449 This study was supported by a Capacity Building and Policy Engagement Grant from the  
450 Stanford King Center on Global Development.

451

#### 452 **DECLARATION OF COMPETING INTEREST**

453 The authors declare no known financial or personal competing interests that could have  
454 influenced the study's work or paper's findings.

455

#### 456 **ACKNOWLEDGEMENTS**

457 We thank our participants for taking the time to share their perspectives; our recruitment  
458 and coding assistants (Hanin Abi Ghannam, Jana Al Khatib, Nathalie Al Saady, Ghiwa Nasr) for  
459 disseminating the survey and synthesizing our data; the National Wellness Network and Mariam  
460 Fadel for assisting in disseminating the survey; the Stanford King Center on Global

461 Development for awarding us a Capacity Building and Policy Engagement Grant; the Stanford  
462 Center for Innovation in Global Health and the Refugee and Asylum seeker Health Initiative  
463 (RAHI) at the University of California, San Francisco for their cultivation of international  
464 collaborations and fostering global health equity; and Drs. Michele Barry, Cybele Renault, Karen  
465 Sokal-Gutierrez, and Anke Hemmerling for their mentorship.

466

## 467 TABLES AND FIGURES

468

469 **Figure 1: Survey Recruitment and Outcomes**

470

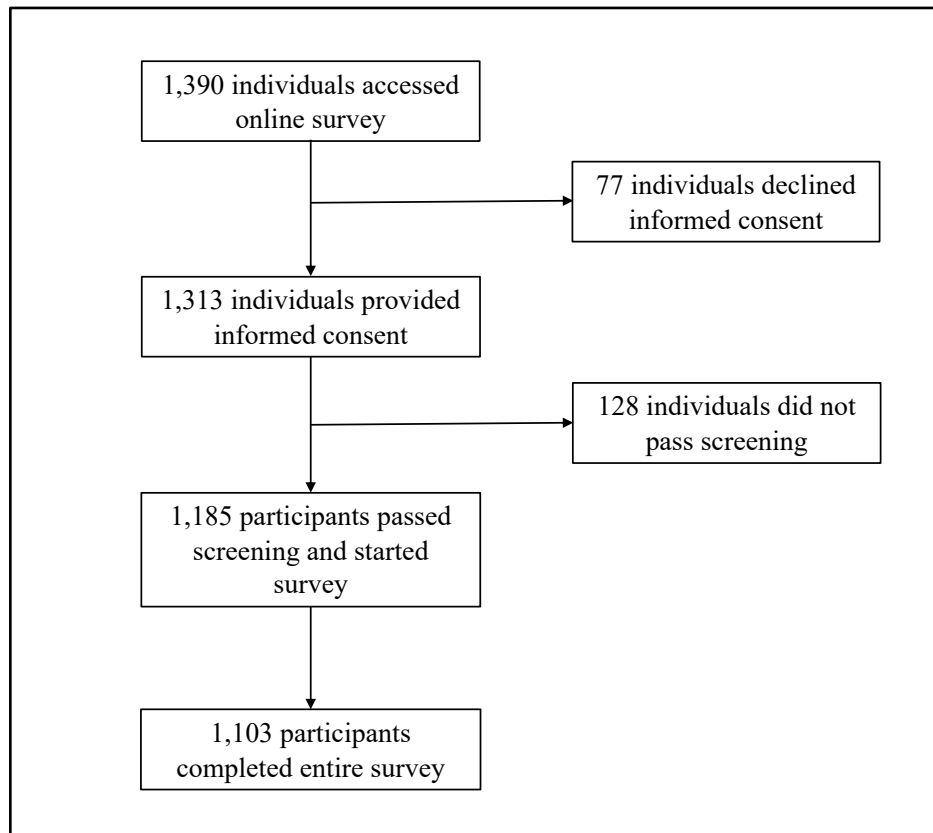

471

472

473

474

475

476

477

478

479

480 **Table 1: Participant Characteristics**

481 This includes all who passed screening. The first column includes all participants aggregated. The second column  
 482 describes those who completed the survey in the first round, prior to initiation of vaccination in Lebanon on 13  
 483 February 2021. The third column describes those who completed the survey in the second round, after initiation of  
 484 vaccination in Lebanon. Because participants were not forced to answer all questions, this results in a different  
 485 denominator for each question.

486 LL: Lebanese Lira

487 NA: Not available in data source

488 <sup>a</sup>Participants could select multiple answers. Proportions were calculated using a denominator of all participants who  
 489 selected an answer for the question.

490 <sup>b</sup>Unless otherwise noted, estimates were obtained from government source that excluded refugees and used 4.84  
 491 million (2018) as total population.

492 <sup>c</sup>Estimates were obtained from source that included refugees and used 6.86 million (2020) as total population.

493

| Characteristic            | All Participants, n (%) | Round 1 Participants, n (%) | Round 2 Participants, n (%) | Estimates for Lebanese Population <sup>b</sup> [6,41–44] |
|---------------------------|-------------------------|-----------------------------|-----------------------------|----------------------------------------------------------|
| <b>Total Participants</b> | 1185 (100)              | 840 (70.9)                  | 345 (29.1)                  |                                                          |
| <b>Gender</b>             |                         |                             |                             |                                                          |
| Female                    | 685 (62.1)              | 479 (60.1)                  | 206 (65.6)                  | 51.6%                                                    |
| Male                      | 388 (35.2)              | 285 (36.1)                  | 103 (32.8)                  | 48.4%                                                    |
| Other                     | 7 (0.1)                 | 6 (0.8)                     | 1 (0.3)                     | NA                                                       |
| Skip this question        | 23 (2.1)                | 19 (2.4)                    | 4 (1.3)                     |                                                          |
| <b>Age</b>                |                         |                             |                             |                                                          |
| 18-24 years old           | 369 (31.1)              | 246 (29.3)                  | 123 (35.7)                  | 15-24 years old:<br>17.5%                                |
| 25-34 years old           | 376 (31.7)              | 247 (29.4)                  | 129 (37.4)                  | 14.5%                                                    |
| 35-44 years old           | 192 (16.2)              | 144 (17.1)                  | 48 (13.9)                   | 11.8%                                                    |
| 45-54 years old           | 126 (10.6)              | 104 (12.4)                  | 22 (6.4)                    | 11.7%                                                    |
| 55-64 years old           | 88 (7.4)                | 69 (8.2)                    | 19 (5.5)                    | 9.6%                                                     |
| 65 years old or older     | 34 (2.9)                | 30 (3.6)                    | 4 (1.2)                     | 10.2%                                                    |
| <b>Governorate</b>        |                         |                             |                             |                                                          |
| Baalbek-Hermel            | 21 (1.9)                | 6 (0.8)                     | 15 (4.8)                    | 5.1%                                                     |
| Beqaa                     | 100 (9.1)               | 47 (6.0)                    | 53 (16.9)                   | 6.2%                                                     |
| Beirut                    | 111 (10.1)              | 89 (11.3)                   | 22 (7.0)                    | 7.1%                                                     |
| Mount Lebanon             | 633 (57.4)              | 559 (70.8)                  | 74 (23.6)                   | 42.3%                                                    |
| South                     | 72 (6.5)                | 26 (3.3)                    | 46 (14.6)                   | 12.2%                                                    |
| Akkar                     | 13 (1.2)                | 3 (0.4)                     | 10 (3.2)                    | 6.8%                                                     |
| North                     | 58 (5.3)                | 21 (2.7)                    | 37 (11.8)                   | 13.3%                                                    |
| Nabatieh                  | 78 (7.1)                | 22 (2.8)                    | 56 (17.8)                   | 7.9%                                                     |
| Skip this question        | 17 (1.5)                | 16 (2.0)                    | 1 (0.3)                     |                                                          |

### Religion

|                    |            |            |           |       |
|--------------------|------------|------------|-----------|-------|
| Christian          | 242 (21.9) | 199 (25.2) | 43 (13.7) | 32.4% |
| Druze              | 355 (32.2) | 308 (39.0) | 47 (15.0) | 4.5%  |
| Shi'a              | 136 (12.3) | 46 (5.8)   | 90 (28.7) | 31.0% |
| Sunni              | 124 (11.2) | 64 (8.1)   | 60 (19.1) | 31.9% |
| No religion        | 65 (5.9)   | 48 (6.1)   | 17 (5.4)  | NA    |
| Other              | 6 (0.5)    | 3 (0.4)    | 3 (1.0)   | 0.3%  |
| Skip this question | 175 (15.9) | 121 (15.3) | 54 (17.2) |       |

### Highest Education Level

|                                                  |            |            |            |       |
|--------------------------------------------------|------------|------------|------------|-------|
| Completed high school, technical school, or less | 200 (18.1) | 143 (18.1) | 57 (18.2)  | 78.6% |
| Completed some college or more                   | 891 (80.9) | 637 (80.8) | 254 (80.9) | 21.4% |
| Skip this question                               | 11 (1.0)   | 8 (1.0)    | 3 (1.0)    |       |

### Employment

|                              |            |            |            |                    |
|------------------------------|------------|------------|------------|--------------------|
| Employed                     | 586 (51.5) | 412 (52.2) | 156 (49.7) | NA                 |
| Student                      | 179 (16.2) | 117 (14.8) | 62 (19.7)  | NA                 |
| Unemployed, not seeking work | 145 (13.1) | 122 (15.5) | 23 (7.3)   | NA                 |
| Unemployed, seeking work     | 154 (14.0) | 101 (12.8) | 53 (16.9)  | 33.0% <sup>c</sup> |
| Skip this question           | 57 (5.2)   | 37 (4.7)   | 20 (6.3)   |                    |

### Annual Income (2019)

|                               |            |            |            |                           |
|-------------------------------|------------|------------|------------|---------------------------|
| < 1,000,000 LL                | 122 (11.1) | 78 (9.9)   | 44 (14.0)  | Reliable data unavailable |
| 1,000,000 LL - 9,999,999 LL   | 289 (26.2) | 199 (25.2) | 90 (28.7)  |                           |
| 10,000,000 LL - 19,999,999 LL | 99 (9.0)   | 67 (8.5)   | 32 (10.2)  |                           |
| 20,000,000 LL - 69,999,999 LL | 132 (12.0) | 100 (12.7) | 32 (10.2)  |                           |
| >70,000,000 LL                | 61 (5.5)   | 49 (6.2)   | 12 (3.8)   |                           |
| Skip this question            | 400 (36.3) | 296 (37.5) | 104 (33.1) |                           |

### Citizenship<sup>a</sup>

|                                    |             |            |            |                               |
|------------------------------------|-------------|------------|------------|-------------------------------|
| Lebanon                            | 1038 (94.1) | 757 (95.9) | 281 (89.5) | Lebanon: 79.8%                |
| Syria                              | 28 (2.5)    | 6 (0.8)    | 6 (1.9)    | Not citizen of Lebanon: 20.2% |
| Palestine                          | 17 (1.5)    | 12 (1.5)   | 12 (3.8)   |                               |
| European or North American country | 40 (3.6)    | 32 (4.1)   | 32 (10.2)  |                               |
| Other country                      | 23 (2.1)    | 16 (2.0)   | 16 (5.1)   |                               |

|                    |             |            |            |                    |
|--------------------|-------------|------------|------------|--------------------|
| Skip this question | 12 (1.1)    | 8 (1.0)    | 8 (2.5)    |                    |
| Multiple countries | 53 (4.8)    | 40 (5.1)   | 40 (12.7)  |                    |
| <b>Refugee</b>     |             |            |            |                    |
| Yes                | 56 (5.1)    | 29 (3.7)   | 27 (8.6)   | 21.9% <sup>c</sup> |
| No                 | 1015 (92.0) | 737 (93.4) | 278 (88.5) | 78.1% <sup>c</sup> |
| Skip this question | 32 (2.9)    | 23 (2.9)   | 9 (2.9)    |                    |

494  
495  
496  
497  
498  
499  
500  
501  
502  
503  
504  
505  
506  
507  
508

**Table 2: Intentions about vaccination by sociodemographic characteristics**

This table shows intention to vaccinate by demographic characteristic for everyone who answered the intention to vaccinate question. For the analysis of each characteristic, we omitted participants who skipped the question, unless >10% of participants for that question skipped the question, in which case those who skipped the characteristic question were included in the analysis. We then calculated the proportion of each characteristic subcategory by intention to vaccinate, calculating Wilson Score confidence intervals.

<sup>a</sup>The survey allowed participants to choose multiple answers for this characteristic; consequently, the sum of all subcategories does not equal the number of all participants who answered the question.

| Characteristic          | Intend to receive vaccine when available | % All Participants [95% CI] |
|-------------------------|------------------------------------------|-----------------------------|
| <b>All participants</b> |                                          |                             |
|                         | Yes                                      | 46.1% [43.2%-49.0%]         |
|                         | No                                       | 19.0% [16.8%-21.4%]         |
|                         | Unsure                                   | 34.0% [31.3%-36.8%]         |
| <b>Gender</b>           |                                          |                             |
| Female                  |                                          |                             |
|                         | Yes                                      | 42.8% [39.1%-46.6%]         |
|                         | No                                       | 21.1% [18.1%-24.4%]         |
|                         | Unsure                                   | 36.1% [32.5%-39.8%]         |
| Male                    |                                          |                             |
|                         | Yes                                      | 55.6% [50.5%-60.6%]         |
|                         | No                                       | 15.6% [12.2%-19.7%]         |
|                         | Unsure                                   | 28.8% [24.4%-33.7%]         |
| Other                   |                                          |                             |
|                         | Yes                                      | 33.3% [6.0%-75.9%]          |
|                         | No                                       | 50.0% [18.8%-81.2%]         |
|                         | Unsure                                   | 16.7% [0.9%-63.5%]          |



## Age

|                       |        |                     |
|-----------------------|--------|---------------------|
| 18-24 years old       | Yes    | 39.6% [34.5%-44.8%] |
|                       | No     | 22.5% [18.4%-27.2%] |
|                       | Unsure | 37.9% [32.9%-43.1%] |
| 25-34 years old       | Yes    | 45.4% [40.3%-50.6%] |
|                       | No     | 23.1% [19.0%-27.8%] |
|                       | Unsure | 31.5% [26.8%-36.5%] |
| 35-44 years old       | Yes    | 50.8% [43.5%-58.0%] |
|                       | No     | 14.1% [9.7%-20.0%]  |
|                       | Unsure | 35.1% [28.4%-42.3%] |
| 45-54 years old       | Yes    | 51.2% [42.1%-60.2%] |
|                       | No     | 12.0% [7.1%-19.3%]  |
|                       | Unsure | 36.8% [28.5%-45.9%] |
| 55-64 years old       | Yes    | 60.2% [49.2%-70.3%] |
|                       | No     | 12.5% [6.7%-21.7%]  |
|                       | Unsure | 27.3% [18.6%-38.0%] |
| 65 years old or older | Yes    | 55.9% [38.1%-72.4%] |
|                       | No     | 11.8% [3.8%-28.4%]  |
|                       | Unsure | 32.4% [18.0%-50.6%] |

## Governorate

|                |        |                     |
|----------------|--------|---------------------|
| Baalbek-Hermel | Yes    | 50.0% [29.9%-70.1%] |
|                | No     | 15.0% [4.0%-38.9%]  |
|                | Unsure | 35.0% [16.3%-59.1%] |
| Beqaa          | Yes    | 59.2% [48.8%-68.9%] |
|                | No     | 12.2% [6.8%-20.8%]  |
|                | Unsure | 28.6% [20.1%-38.7%] |
| Beirut         | Yes    | 53.2% [43.5%-62.6%] |
|                | No     | 16.2% [10.1%-24.7%] |
|                | Unsure | 30.6% [22.4%-40.2%] |

|                 |        |                     |
|-----------------|--------|---------------------|
| Mount Lebanon   | Yes    | 42.2% [38.4%-46.2%] |
|                 | No     | 22.8% [19.6%-26.3%] |
|                 | Unsure | 35.0% [31.3%-38.8%] |
| South           | Yes    | 57.1% [44.8%-68.7%] |
|                 | No     | 10.0% [4.5%-20.1%]  |
|                 | Unsure | 32.9% [22.4%-45.2%] |
| Akkar           | Yes    | 84.6% [53.7%-97.3%] |
|                 | No     | 7.7% [0.4%-37.9%]   |
|                 | Unsure | 7.7% [0.4%-37.9%]   |
| North           | Yes    | 46.6% [33.5%-60.0%] |
|                 | No     | 17.2% [9.0%-29.9%]  |
|                 | Unsure | 36.2% [24.3%-49.9%] |
| Nabatieh        | Yes    | 50.6% [39.1%-62.1%] |
|                 | No     | 18.2% [10.6%-29.0%] |
|                 | Unsure | 31.2% [21.4%-42.9%] |
| <b>Religion</b> |        |                     |
| Christian       | Yes    | 60.3% [53.8%-66.4%] |
|                 | No     | 9.5% [6.2%-14.1%]   |
|                 | Unsure | 30.2% [24.5%-36.4%] |
| Druze           | Yes    | 35.6% [30.6%-40.9%] |
|                 | No     | 25.4% [21.0%-30.3%] |
|                 | Unsure | 39.0% [33.9%-44.3%] |
| Shi'a           | Yes    | 48.5% [39.8%-57.3%] |
|                 | No     | 16.4% [10.8%-24.0%] |
|                 | Unsure | 35.1% [27.2%-43.8%] |
| Sunni           | Yes    | 57.4% [48.1%-66.2%] |
|                 | No     | 21.3% [14.6%-29.8%] |
|                 | Unsure | 21.3% [14.6%-29.8%] |
| No religion     | Yes    | 58.5% [45.6%-70.3%] |

|                                                  |        |                     |
|--------------------------------------------------|--------|---------------------|
|                                                  | No     | 16.9% [9.1%-28.7%]  |
|                                                  | Unsure | 24.6% [15.1%-37.1%] |
| Other                                            | Yes    | 20.0% [1.1%-70.1%]  |
|                                                  | No     | 0.0% [0.0%-53.7%]   |
|                                                  | Unsure | 80.0% [29.9%-99.0%] |
| Skip this question                               | Yes    | 39.9% [32.6%-47.6%] |
|                                                  | No     | 24.9% [18.8%-32.1%] |
|                                                  | Unsure | 35.3% [28.3%-42.9%] |
| <b>Education</b>                                 |        |                     |
| Completed high school, technical school, or less |        |                     |
|                                                  | Yes    | 42.1% [35.2%-49.4%] |
|                                                  | No     | 21.3% [16.0%-27.8%] |
|                                                  | Unsure | 36.5% [30.0%-43.7%] |
| Completed some college or more                   |        |                     |
|                                                  | Yes    | 48.8% [45.4%-52.1%] |
|                                                  | No     | 18.5% [16.0%-21.3%] |
|                                                  | Unsure | 32.7% [29.7%-35.9%] |
| <b>Employment</b>                                |        |                     |
| Employed                                         |        |                     |
|                                                  | Yes    | 51.6% [47.4%-55.8%] |
|                                                  | No     | 17.1% [14.2%-20.6%] |
|                                                  | Unsure | 31.3% [27.5%-35.3%] |
| Student                                          |        |                     |
|                                                  | Yes    | 43.0% [35.7%-50.6%] |
|                                                  | No     | 21.2% [15.6%-28.1%] |
|                                                  | Unsure | 35.8% [28.8%-43.3%] |
| Unemployed, not seeking work                     |        |                     |
|                                                  | Yes    | 42.1% [34.0%-50.6%] |
|                                                  | No     | 18.6% [12.8%-26.1%] |
|                                                  | Unsure | 39.3% [31.4%-47.8%] |
| Unemployed, seeking work                         |        |                     |
|                                                  | Yes    | 41.4% [33.6%-49.7%] |

|                                |        |                     |
|--------------------------------|--------|---------------------|
|                                | No     | 23.0% [16.8%-30.7%] |
|                                | Unsure | 35.5% [28.1%-30.7%] |
| <b>Annual Income</b>           |        |                     |
| < 1,000,000 LL                 |        |                     |
|                                | Yes    | 34.7% [26.4%-44.0%] |
|                                | No     | 25.6% [18.3%-34.5%] |
|                                | Unsure | 39.7% [31.0%-49.0%] |
| 1,000,000 LL - 9,999,999 LL    |        |                     |
|                                | Yes    | 45.6% [39.8%-51.6%] |
|                                | No     | 18.8% [14.6%-23.9%] |
|                                | Unsure | 35.5% [30.1%-41.4%] |
| 10,000,000 LL - 19,999,999 LL  |        |                     |
|                                | Yes    | 47.5% [37.4%-57.7%] |
|                                | No     | 24.2% [16.4%-34.1%] |
|                                | Unsure | 28.3% [19.9%-38.4%] |
| 20,000,000 LL - 69,999,999 LL  |        |                     |
|                                | Yes    | 63.4% [54.4%-71.5%] |
|                                | No     | 9.2% [5.0%-15.8%]   |
|                                | Unsure | 27.5% [20.2%-36.1%] |
| >70,000,000 LL                 |        |                     |
|                                | Yes    | 68.8% [55.6%-79.8%] |
|                                | No     | 6.6% [2.1%-16.7%]   |
|                                | Unsure | 24.6% [14.8%-37.6%] |
| Skip this question             |        |                     |
|                                | Yes    | 42.9% [38.0%-48.0%] |
|                                | No     | 22.7% [18.8%-27.2%] |
|                                | Unsure | 34.3% [29.7%-39.3%] |
| <b>Citizenship<sup>a</sup></b> |        |                     |
| Lebanon                        |        |                     |
|                                | Yes    | 47.2% [44.2%-50.3%] |
|                                | No     | 19.1% [16.7%-21.6%] |
|                                | Unsure | 33.7% [30.8%-36.7%] |
| Syria                          |        |                     |
|                                | Yes    | 40.7% [23.0%-61.0%] |
|                                | No     | 37.0% [20.1%-57.5%] |
|                                | Unsure | 22.2% [9.4%-42.7%]  |
| Palestine                      |        |                     |
|                                | Yes    | 58.8% [33.5%-80.6%] |

|                                                                    |        |                     |
|--------------------------------------------------------------------|--------|---------------------|
|                                                                    | No     | 11.8% [2.1%-37.7%]  |
|                                                                    | Unsure | 29.4% [11.4%-56.0%] |
| European or North American country                                 |        |                     |
|                                                                    | Yes    | 62.5% [45.8%-76.8%] |
|                                                                    | No     | 12.5% [4.7%-27.6%]  |
|                                                                    | Unsure | 25.0% [13.2%-41.5%] |
| Other country                                                      |        |                     |
|                                                                    | Yes    | 31.8% [14.7%-54.8%] |
|                                                                    | No     | 18.2% [6.0%-41.0%]  |
|                                                                    | Unsure | 50.0% [30.7%-69.3%] |
| Multiple countries                                                 |        |                     |
|                                                                    | Yes    | 54.7% [40.6%-68.2%] |
|                                                                    | No     | 13.2% [5.9%-26.0%]  |
|                                                                    | Unsure | 32.1% [20.3%-46.4%] |
| <b>Refugee</b>                                                     |        |                     |
| Yes                                                                |        |                     |
|                                                                    | Yes    | 50.0% [37.1%-62.9%] |
|                                                                    | No     | 25.9% [15.4%-39.9%] |
|                                                                    | Unsure | 24.1% [13.9%-37.9%] |
| No                                                                 |        |                     |
|                                                                    | Yes    | 46.9% [43.8%-50.0%] |
|                                                                    | No     | 19.0% [16.7%-21.6%] |
|                                                                    | Unsure | 34.1% [31.2%-37.1%] |
| <b>Completed Survey After Initiation of Vaccination in Lebanon</b> |        |                     |
| Yes                                                                |        |                     |
|                                                                    | Yes    | 56.9% [51.5%-62.2%] |
|                                                                    | No     | 12.7% [9.4%-16.8%]  |
|                                                                    | Unsure | 30.4% [25.6%-35.6%] |
| No                                                                 |        |                     |
|                                                                    | Yes    | 42.3% [38.9%-45.7%] |
|                                                                    | No     | 21.8% [19.1%-24.8%] |
|                                                                    | Unsure | 35.9% [32.7%-39.3%] |

509

510

511

512

513

514

515

516 **Figure 2: Intention to receive SARS-CoV-2 vaccine by Age Group and Gender**

517 In these graphs, the sample population is stratified by age group and gender. For each stratum, the proportion (as a  
 518 percentage) that indicated that they intend to receive the vaccine, do not intend to receive the vaccine, and are unsure  
 519 about receiving the vaccine is displayed in the corresponding cell in the top, middle, and bottom graphs,  
 520 respectively. This analysis only includes participants who provided age, gender, and their intentions about  
 521 vaccination. As only 7 participants identified as “other” gender, only participants identifying as “male” or “female”  
 522 were included.

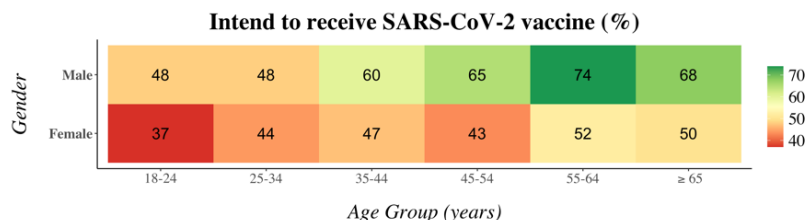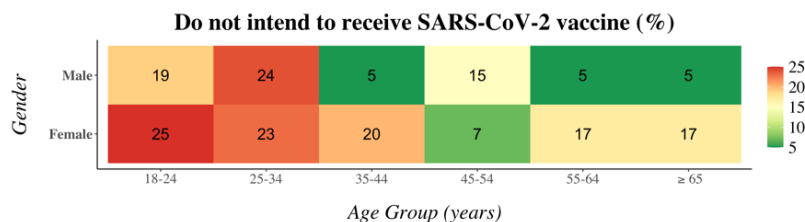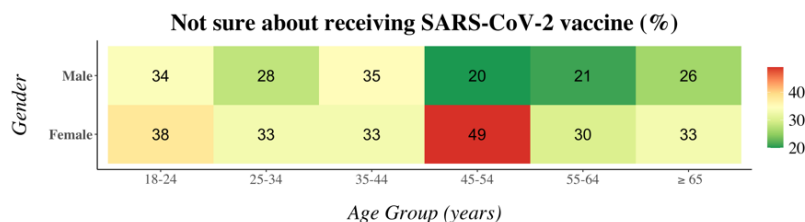

523  
 524  
 525  
 526  
 527  
 528  
 529  
 530  
 531  
 532  
 533  
 534  
 535

**536 Table 3: Intentions about vaccination by experiences with COVID-19**

537 This shows intentions to vaccinate broken down by knowledge of and experience with COVID-19 for everyone who  
 538 answered the intention to vaccinate question. For the analysis of each characteristic, we omitted participants who  
 539 skipped the question, unless >10% of participants for that question skipped the question, in which case those who  
 540 skipped the characteristic question were included in the analysis. We then calculated the proportion of each  
 541 characteristic subcategory by intention to vaccinate, calculating Wilson Score confidence intervals.

542 <sup>a</sup>“Correct Knowledge” indicated a correct response to a multiple choice question asking, “In your understanding,  
 543 how does someone become infected with coronavirus? Choose the best single answer.” The correct response was  
 544 “Being physically close to an infected person.” Incorrect responses were “Eating raw food or untreated water,” and  
 545 “Being bitten by an insect.”

546 <sup>b</sup>The survey allowed participants to choose multiple answers for this characteristic; consequently, the sum of all  
 547 subcategories does not equal the number of all participants who answered the question.

| Characteristic                                       | Intend to receive vaccine when available | All Participants [95% CI] |
|------------------------------------------------------|------------------------------------------|---------------------------|
| <b>Correct Knowledge of Transmission<sup>a</sup></b> |                                          |                           |
| Yes                                                  |                                          | n = 1076 (99.1%)          |
|                                                      | Yes                                      | 48.0% [45.1%-51.1%]       |
|                                                      | No                                       | 18.1% [15.9%-20.6%]       |
|                                                      | Unsure                                   | 33.8% [31.0%-36.8%]       |
| No                                                   |                                          | n = 10 (0.9%)             |
|                                                      | Yes                                      | 50.0% [23.7%-76.3%]       |
|                                                      | No                                       | 40.0% [13.7%-72.6%]       |
|                                                      | Unsure                                   | 10.0% [0.5%-45.9%]        |
| <b>Personal history of COVID-19</b>                  |                                          |                           |
| Yes                                                  |                                          | n = 321 (28.9%)           |
|                                                      | Yes                                      | 42.9% [37.5%-48.6%]       |
|                                                      | No                                       | 21.6% [17.3%-26.6%]       |
|                                                      | Unsure                                   | 35.4% [30.2%-41.0%]       |
| No                                                   |                                          | n = 790 (71.1%)           |
|                                                      | Yes                                      | 48.8% [45.2%-52.3%]       |
|                                                      | No                                       | 18.5% [15.9%-21.5%]       |
|                                                      | Unsure                                   | 32.7% [29.4%-36.1%]       |
| <b>Close acquaintance with history of COVID-19</b>   |                                          |                           |
| Yes                                                  |                                          | n = 1056 (94.2%)          |
|                                                      | Yes                                      | 48.0% [44.9%-51.0%]       |
|                                                      | No                                       | 18.8% [16.5%-21.3%]       |
|                                                      | Unsure                                   | 33.3% [30.4%-36.2%]       |
| No                                                   |                                          | n = 65 (5.8%)             |
|                                                      | Yes                                      | 33.3% [22.2%-46.4%]       |
|                                                      | No                                       | 30.2% [19.6%-43.2%]       |

|                                                          |        |                     |
|----------------------------------------------------------|--------|---------------------|
|                                                          | Unsure | 36.5% [25.0%-49.6%] |
| <b>Mask Wearing Outside Home</b>                         |        |                     |
| Always or Most of the Time                               |        | n = 1011 (91.2%)    |
|                                                          | Yes    | 50.0% [46.8%-53.1%] |
|                                                          | No     | 16.3% [14.1%-18.8%] |
|                                                          | Unsure | 33.7% [30.8%-36.8%] |
| Sometimes, Rarely, or Never                              |        | n = 97 (8.8%)       |
|                                                          | Yes    | 18.6% [11.7%-28.0%] |
|                                                          | No     | 48.5% [38.3%-58.8%] |
|                                                          | Unsure | 33.0% [24.0%-43.4%] |
| <b>Top 3 News Sources<sup>b</sup></b>                    |        |                     |
| Printed newspaper or magazine                            |        | n = 86 (7.8%)       |
|                                                          | Yes    | 64.0% [52.8%-73.8%] |
|                                                          | No     | 9.3% [4.4%-18.0%]   |
|                                                          | Unsure | 26.7% [18.0%-37.6%] |
| Radio                                                    |        | n = 33 (3.0%)       |
|                                                          | Yes    | 69.7% [51.1%-83.8%] |
|                                                          | No     | 15.2% [5.7%-32.7%]  |
|                                                          | Unsure | 15.2% [5.7%-32.7%]  |
| Television                                               |        | n = 718 (65.1%)     |
|                                                          | Yes    | 47.2% [43.5%-50.9%] |
|                                                          | No     | 17.1% [14.5%-20.1%] |
|                                                          | Unsure | 35.7% [32.2%-39.3%] |
| Social media (like Facebook, Twitter, YouTube, WhatsApp) |        | n = 670 (60.1%)     |
|                                                          | Yes    | 43.7% [39.9%-47.6%] |
|                                                          | No     | 19.4% [16.5%-22.6%] |
|                                                          | Unsure | 36.9% [33.2%-40.7%] |
| Internet, but not social media (like websites)           |        | n = 609 (55.2%)     |
|                                                          | Yes    | 53.5% [49.5%-57.5%] |
|                                                          | No     | 17.4% [14.5%-20.7%] |
|                                                          | Unsure | 29.1% [25.5%-32.9%] |
| Talking to friends or family                             |        | n = 282 (25.6%)     |
|                                                          | Yes    | 37.6% [32.0%-43.6%] |



|                   |        |                     |
|-------------------|--------|---------------------|
|                   | No     | 24.1% [19.3%-29.6%] |
|                   | Unsure | 38.3% [32.6%-44.3%] |
| Religious leaders |        | n = 6 (0.5%)        |
|                   | Yes    | 16.7% [0.9%-63.5%]  |
|                   | No     | 83.3% [36.5%-99.1%] |
|                   | Unsure | 0.0% [0.0%-48.3%]   |

548  
549  
550  
551  
552  
553  
554  
555  
556

**Figure 3: Preferred vaccination locations**

Percentages of each response were calculated by dividing the number of participants who selected a response by the total number of participants who answered this question.

\*The survey allowed participants to choose multiple answers for this question; consequently, the sum of all subcategories does not equal the number of all participants who answered the question.

^If participants selected “Other,” they could write in their own response. The three responses in parenthesis (Lebanese Red Cross, Military Primary Health Center, other health organization) encompass the written-in responses.

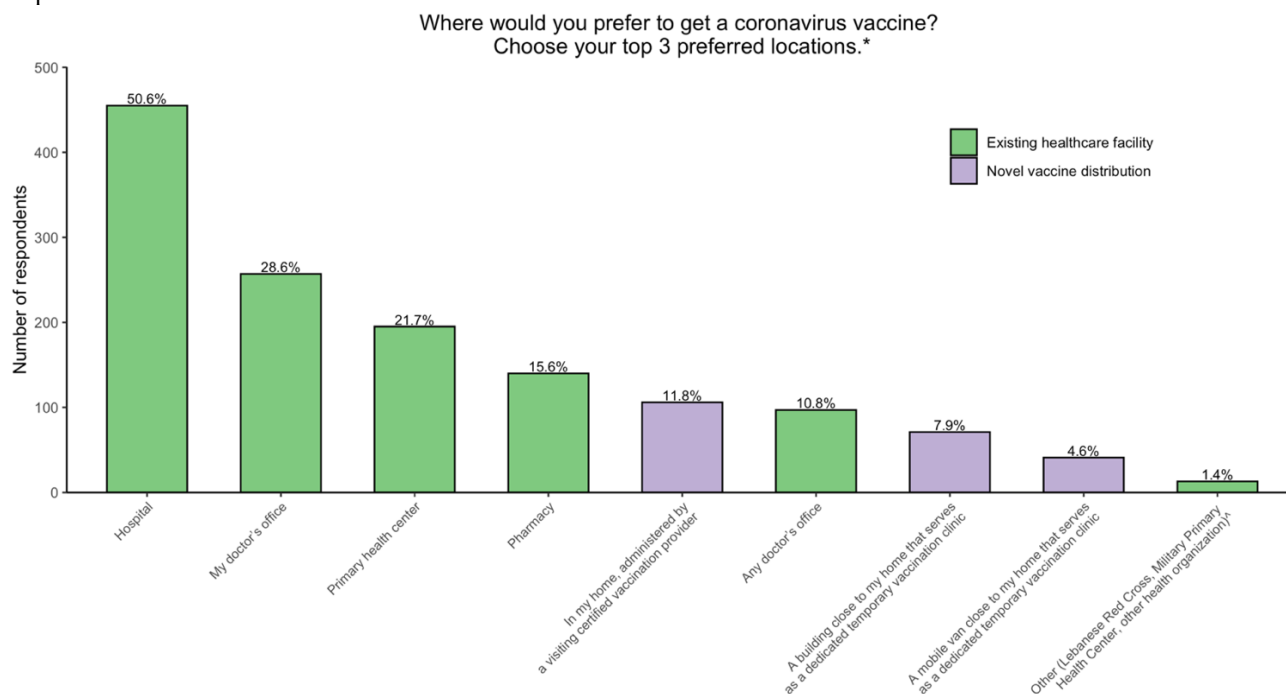

565  
566  
567  
568  
569  
570

571 **Figure 4: Most common and most trusted news sources about coronavirus**

572 This figure summarizes responses to two separate questions, the first asking which news sources participants most  
573 commonly used, and the second asking which news sources they trusted most. Percentages of each response were  
574 calculated by dividing the number of participants who selected a response by the total number of participants who  
575 answered that question.

576 \*The survey allowed participants to choose multiple answers for these questions; consequently, the sum of all  
577 subcategories does not equal the number of all participants who answered the questions.

578

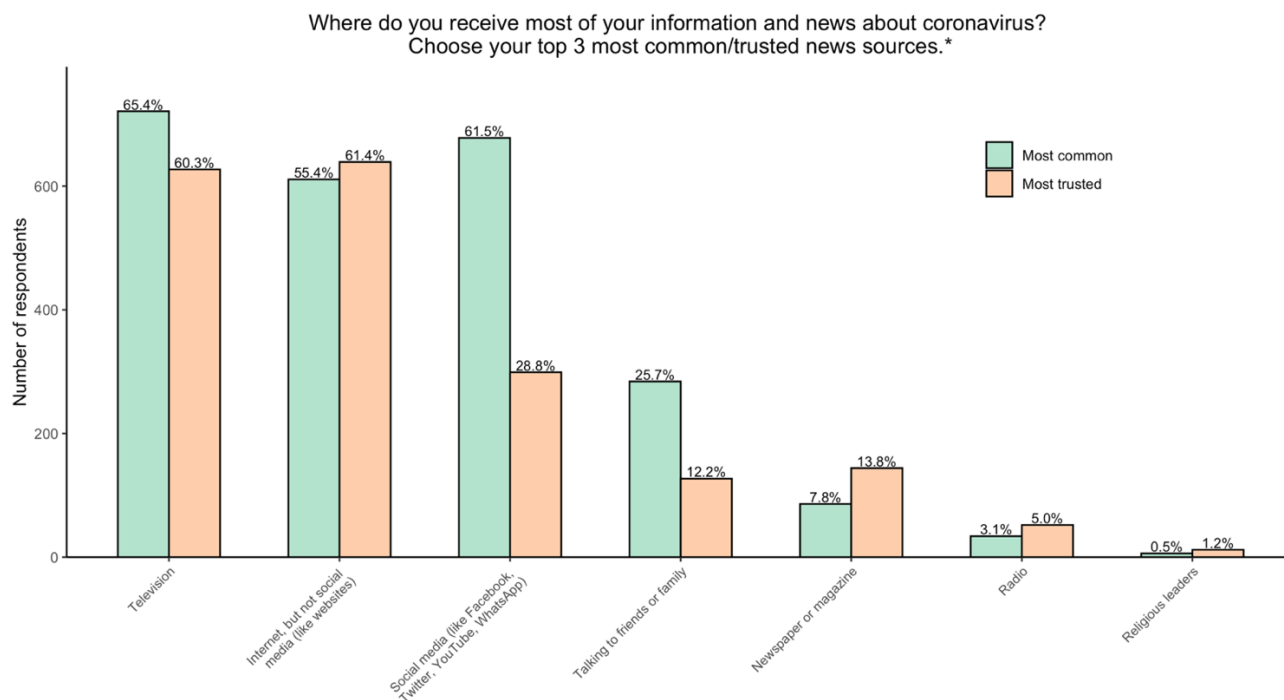

579  
580  
581  
582  
583  
584  
585  
586  
587  
588  
589  
590  
591  
592  
593  
594  
595  
596  
597  
598  
599

600  
 601 **Table 4: Summary of coded open-ended responses describing motivations for intentions about vaccination**  
 602 This shows the most frequently observed codes in the optional open-ended responses to questions asking about  
 603 motivations behind deciding to vaccinate, deciding not to vaccinate, and being uncertain about vaccination. For each  
 604 group (intending to vaccinate, not intending to vaccinate, and uncertainty about vaccination), the denominator was  
 605 the total number of participants in the group who provided a free-response to the question.  
 606 <sup>a</sup>“Most frequent codes” were observed in  $\geq 15\%$  of responses to the question.  
 607 <sup>b</sup>“Less frequent codes” were observed in 3%-15% of responses to the question.  
 608

**TABLE 4: SUMMARY OF CODED OPEN-ENDED RESPONSES DESCRIBING MOTIVATIONS**

|                                                      | <b>Most frequent codes (descending frequency)</b> | <b>Less frequent codes (descending frequency)</b>                                                                                                                     |
|------------------------------------------------------|---------------------------------------------------|-----------------------------------------------------------------------------------------------------------------------------------------------------------------------|
| <b>Motivations for intending to vaccinate</b>        | To protect myself                                 | I do not have another better choice or solution                                                                                                                       |
|                                                      | To protect and limit spread among the public      | I trust it based on science and research                                                                                                                              |
|                                                      | To end the pandemic and return to normalcy        | I want to help achieve "herd immunity"                                                                                                                                |
|                                                      | To protect my family                              | I have other medical conditions that make my risk of illness higher<br>My job puts me at risk of contracting COVID-19                                                 |
| <b>Motivations for not intending to vaccinate</b>    | I am concerned about safety and limited testing   | I do not trust the Lebanese government                                                                                                                                |
|                                                      | I am concerned about potential side effects       | I do not trust Lebanese healthcare and/or distribution systems                                                                                                        |
|                                                      | Nonspecific mistrust of the SARS-CoV-2 vaccines   | COVID-19 and/or vaccines are a scam/conspiracy to make money                                                                                                          |
|                                                      | I am worried that the vaccines are not effective  | General vaccine hesitancy; I am against all vaccines<br>Problems or concerns with ingredients                                                                         |
|                                                      |                                                   | I do not need the vaccine because I already had COVID-19<br>COVID-19 is not a threat to me or in general<br>Risks of vaccination are not worth the potential benefits |
|                                                      |                                                   | Society and science in general do not know enough about COVID-19 (causes, symptoms, effects)                                                                          |
| <b>Motivations for uncertainty about vaccination</b> | I am concerned about safety and limited testing   | I do not think I need the vaccine because I already had COVID-19                                                                                                      |
|                                                      | I am concerned about potential side effects       | I do not trust the Lebanese government                                                                                                                                |
|                                                      | I am worried that the vaccines are not effective  | Nonspecific mistrust of the SARS-CoV-2 vaccines<br>I do not have enough information about the vaccines                                                                |
|                                                      |                                                   | I want more time or more information before I decide which vaccine to take                                                                                            |

I have received conflicting information about the vaccine from one or more sources

I have concerns about mRNA technology

I do not trust Lebanese healthcare and/or distribution systems

I think the vaccines in Lebanon will not be the true coronavirus vaccine, or that they will be tampered with

609  
610

611

- 612 [1] Ritchie H, Ortiz-Ospina E, Beltekian D, Mathieu E, Hasell J, Macdonald B, et al.  
613 Coronavirus Pandemic (COVID-19). Our World in Data 2020.
- 614 [2] Khoury P, Azar E, Hitti E. COVID-19 Response in Lebanon. JAMA 2020;324:548–9.  
615 <https://doi.org/10.1001/jama.2020.12695>.
- 616 [3] Bizri AR, Khachfe HH, Fares MY, Musharrafieh U. COVID-19 Pandemic: An Insult Over  
617 Injury for Lebanon. Journal of Community Health 2020. [https://doi.org/10.1007/s10900-](https://doi.org/10.1007/s10900-020-00884-y)  
618 [020-00884-y](https://doi.org/10.1007/s10900-020-00884-y).
- 619 [4] Kenner D. The struggle to keep Lebanon healthy | ICWA. Institute of Current World  
620 Affairs 2021.
- 621 [5] Economic and Social Commission for Western Asia. ESCWA warns: more than half of  
622 Lebanon’s population trapped in poverty. United Nations ESCWA 2020.  
623 <https://www.unescwa.org/news/Lebanon-poverty-2020> (accessed December 12, 2020).
- 624 [6] World Health Organization. Regional Office for the Eastern Mediterranean. Country  
625 cooperation strategy: Lebanon: 2019-2023. 2018.
- 626 [7] Ministry of Public Health (Lebanon). Corona Virus Vaccination Dashboard - Registration  
627 2021. <https://www.moph.gov.lb/maps/covid19.php> (accessed May 6, 2021).
- 628 [8] el Deeb S. Lebanon administers 1st vaccines to health workers, elderly. Associated Press  
629 2021.
- 630 [9] Mroue B. Lebanon private sector steps in to speed up vaccine campaign - ABC News.  
631 Associated Press 2021.
- 632 [10] Republic of Lebanon Ministry of Public Health. Lebanon National Deployment and  
633 Vaccination Plan for COVID-19 Vaccines. 2021.
- 634 [11] Sakr S, Ghaddar A, Sheet I, Eid AH, Hamam B. Knowledge, attitude and practices related  
635 to COVID-19 among young Lebanese population. BMC Public Health 2021;21.  
636 <https://doi.org/10.1186/s12889-021-10575-5>.
- 637 [12] el Khoury G, Salameh P. Influenza vaccination: A cross-sectional survey of knowledge,  
638 attitude and practices among the lebanese adult population. International Journal of  
639 Environmental Research and Public Health 2015;12:15486–97.  
640 <https://doi.org/10.3390/ijerph121215000>.
- 641 [13] European Centre for Disease Prevention and Control. Seasonal influenza vaccination in  
642 Europe – Vaccination recommendations and coverage rates for eight influenza seasons  
643 (2007–2008 to 2014–2015). 2017.

- 644 [14] Romani MH, Musharrafieh UM, Lakkis NA, Hamadeh GN. Family physicians beliefs and  
645 attitudes regarding adult pneumococcal and influenza immunization in Lebanon. *Family*  
646 *Practice* 2011;28:632–7. <https://doi.org/10.1093/fampra/cmz038>.
- 647 [15] Kmeid M, Azouri H, Aaraj R, Bechara E, Antonios D. Vaccine coverage for Lebanese  
648 citizens and Syrian refugees in Lebanon. *International Health* 2019;11:568–79.  
649 <https://doi.org/10.1093/inthealth/ihz023>.
- 650 [16] Mansour Z, Hamadeh R, Rady A, Danovaro-Holliday MC, Fahmy K, Said R, et al.  
651 Vaccination coverage in Lebanon following the Syrian crisis: Results from the district-  
652 based immunization coverage evaluation survey 2016. *BMC Public Health* 2019;19.  
653 <https://doi.org/10.1186/s12889-019-6418-9>.
- 654 [17] Robertson T, Weiss W, Oweis A, Zaheya LA, Lyles E, Burnham G, et al. Challenges in  
655 estimating vaccine coverage in refugee and displaced populations: Results from household  
656 surveys in Jordan and Lebanon. *Vaccines* 2017;5.  
657 <https://doi.org/10.3390/vaccines5030022>.
- 658 [18] Schwarzingler M, Watson V, Arwidson P, Alla F, Luchini S. COVID-19 vaccine hesitancy  
659 in a representative working-age population in France: a survey experiment based on  
660 vaccine characteristics. *The Lancet Public Health* 2021;6:e210–21.  
661 [https://doi.org/10.1016/S2468-2667\(21\)00012-8](https://doi.org/10.1016/S2468-2667(21)00012-8).
- 662 [19] Gadoth A, Halbrook M, Martin-Blais R, Gray A, Tobin NH, Ferbas KG, et al. Cross-  
663 sectional Assessment of COVID-19 Vaccine Acceptance Among Health Care Workers in  
664 Los Angeles. *Annals of Internal Medicine* 2021. <https://doi.org/10.7326/m20-7580>.
- 665 [20] Sallam M. Covid-19 vaccine hesitancy worldwide: A concise systematic review of  
666 vaccine acceptance rates. *Vaccines* 2021;9:1–15.  
667 <https://doi.org/10.3390/vaccines9020160>.
- 668 [21] World Health Organization. Guidance on developing a national deployment and  
669 vaccination plan for COVID-19 vaccines. 2020.
- 670 [22] Brenner H. Focusing COVID-19 vaccinations on elderly and high-risk people. *The Lancet*  
671 *Regional Health - Europe* 2021;2:100044. <https://doi.org/10.1016/j.lanep.2021.100044>.
- 672 [23] Al-Mohaithef M, Padhi BK. Determinants of COVID-19 Vaccine Acceptance in Saudi  
673 Arabia: A Web-Based National Survey. *Journal of Multidisciplinary Healthcare*  
674 2020;Volume 13:1657–63. <https://doi.org/10.2147/jmdh.s276771>.
- 675 [24] Qualtrics 2021.
- 676 [25] Lazarus J v., Ratzan SC, Palayew A, Gostin LO, Larson HJ, Rabin K, et al. A global  
677 survey of potential acceptance of a COVID-19 vaccine. *Nature Medicine* 2020.  
678 <https://doi.org/10.1038/s41591-020-1124-9>.
- 679 [26] Fisher KA, Bloomstone SJ, Walder J, Crawford S, Fouayzi H, Mazor KM. Attitudes  
680 Toward a Potential SARS-CoV-2 Vaccine: A Survey of U.S. Adults. *Annals of Internal*  
681 *Medicine* 2020. <https://doi.org/10.7326/m20-3569>.
- 682 [27] Microsoft Corporation. Microsoft Excel 2021.
- 683 [28] R Core Team. R: A language and environment for statistical computing 2020.
- 684 [29] MacDonald NE, Eskola J, Liang X, Chaudhuri M, Dube E, Gellin B, et al. Vaccine  
685 hesitancy: Definition, scope and determinants. *Vaccine* 2015;33:4161–4.  
686 <https://doi.org/10.1016/j.vaccine.2015.04.036>.
- 687 [30] Alqudeimat Y, Alenezi D, AlHajri B, Alfouzan H, Almokhaizeem Z, Altamimi S, et al.  
688 Acceptance of a COVID-19 Vaccine and its Related Determinants among the General

- 689 Adult Population in Kuwait. *Medical Principles and Practice* 2021.  
690 <https://doi.org/10.1159/000514636>.
- 691 [31] Alabdulla M, Reagu SM, Al-Khal A, Elzain M, Jones RM. COVID-19 vaccine hesitancy  
692 and attitudes in Qatar: A national cross-sectional survey of a migrant-majority population.  
693 *Influenza and Other Respiratory Viruses* 2021;15:361. <https://doi.org/10.1111/irv.12847>.
- 694 [32] Sallam M, Dababseh D, Eid H, Al-Mahzoum K, Al-Haidar A, Taim D, et al. High rates of  
695 covid-19 vaccine hesitancy and its association with conspiracy beliefs: A study in Jordan  
696 and Kuwait among other Arab countries. *Vaccines* 2021;9:1–16.  
697 <https://doi.org/10.3390/vaccines9010042>.
- 698 [33] Institute of Global Health Innovation. Covid-19: Global attitudes towards a COVID-19  
699 vaccine. 2021.
- 700 [34] Malik AA, McFadden SAM, Elharake J, Omer SB. Determinants of COVID-19 vaccine  
701 acceptance in the US. *EClinicalMedicine* 2020;26.  
702 <https://doi.org/10.1016/j.eclinm.2020.100495>.
- 703 [35] Machida M, Nakamura I, Kojima T, Saito R, Nakaya T, Hanibuchi T, et al. Acceptance of  
704 a COVID-19 Vaccine in Japan during the COVID-19 Pandemic. *Vaccines* 2021;9:210.  
705 <https://doi.org/10.3390/vaccines9030210>.
- 706 [36] Murphy J, Vallières F, Bentall RP, Shevlin M, McBride O, Hartman TK, et al.  
707 Psychological characteristics associated with COVID-19 vaccine hesitancy and resistance  
708 in Ireland and the United Kingdom. *Nature Communications* 2021;12:1–15.  
709 <https://doi.org/10.1038/s41467-020-20226-9>.
- 710 [37] Lin C, Tu P, Beitsch LM. Confidence and receptivity for covid-19 vaccines: A rapid  
711 systematic review. *Vaccines* 2021;9:1–32. <https://doi.org/10.3390/vaccines9010016>.
- 712 [38] Soares P, Rocha JV, Moniz M, Gama A, Laires PA, Pedro AR, et al. Factors associated  
713 with COVID-19 vaccine hesitancy. *Vaccines* 2021;9.  
714 <https://doi.org/10.3390/vaccines9030300>.
- 715 [39] Mansour Z, Brandt L, Said R, Fahmy K, Riedner G, Danovaro-Holliday MC. Home-based  
716 records' quality and validity of caregivers' recall of children's vaccination in Lebanon.  
717 *Vaccine* 2019;37:4177–83. <https://doi.org/10.1016/j.vaccine.2019.05.032>.
- 718 [40] United Nations Development Programme. Below the Surface: Results of a WhatsApp  
719 Survey of Syrian Refugees and Host Communities in Lebanon. United Nations  
720 Development Programme 2018. <https://data2.unhcr.org/en/documents/details/67579>  
721 (accessed May 7, 2021).
- 722 [41] Lebanon's Central Administration for Statistics (CAS), International Labour Organization.  
723 Labour Force and Household Living Conditions Survey (LFHLCS) in Lebanon 2018–  
724 2019. 2019.
- 725 [42] Central Intelligence Agency U. Lebanon - The World Factbook n.d.  
726 <https://www.cia.gov/the-world-factbook/countries/lebanon/> (accessed May 4, 2021).
- 727 [43] United Nations World Food Programme. Assessing the Impact of the Economic and  
728 COVID-19 Crises in Lebanon - June 2020. 2020.
- 729 [44] The World Bank. Lebanon | Data. 2021 n.d. <https://data.worldbank.org/country/lebanon>  
730 (accessed May 4, 2021).
- 731
